# Supplementary material
Source: publisher site journal article supplement (https://www.dovepress.com/article/593590)
Supplement: Supplementary file 1 [file 593590%20Revised%20Supplementary%20Table%201.pdf]

**Supplementary Table 1. Baseline clinical and laboratory characteristics of the study cohort**

| <b>Clinical variable</b>  | <b>Sepsis (N=29)</b> | <b>SIRS (N=11)</b> | <b><i>P</i> value</b> |
|---------------------------|----------------------|--------------------|-----------------------|
| Gender (M/F)              | 10/19                | 5/6                | 0.716                 |
| 28-day outcome (S/D)      | 23/6                 | 11/0               | 0.162                 |
| WBC (10 <sup>9</sup> /l)  | 12.069±9.026         | 12.465±4.725       | 0.891                 |
| NEU (10 <sup>9</sup> /l)  | 10.29±8.086          | 10.61±4.4811       | 0.902                 |
| MONO (10 <sup>9</sup> /l) | 0.968±1.826          | 0.672±0.334        | 0.599                 |
| LYM (10 <sup>9</sup> /l)  | 3.12±5.468           | 1.105±0.327        | 0.058                 |
| PCT (ng/ml)               | 31.183±38.292        | 9.092±26.713       | 0.05                  |
| ALT (u/l)                 | 95.738±177.701       | 59.264±65.809      | 0.515                 |
| Total bilirubin (umol/L)  | 21.61±17.271         | 16.291±7.830       | 0.19                  |
| Creatinine (umol/L)       | 144.866±148.849      | 92.546±69.937      | 0.273                 |
| Troponin (ug/L)           | 0.232±0.834          | 0.059±0.139        | 0.503                 |
